# Supplementary material for: Vertical characteristics of aerosol hygroscopicity and impacts on optical properties over the North China Plain during winter
Source: Copernicus journal article supplement (doi:10.5194/acp-20-3931-2020), 2020-04-01
Supplement: Supplementary file 1 [file acp-20-3931-2020-supplement.pdf]

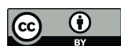

*Supplement of*

## **Vertical characteristics of aerosol hygroscopicity and impacts on optical properties over the North China Plain during winter**

**Quan Liu et al.**

*Correspondence to:* Dantong Liu ([dantongliu@zju.edu.cn](mailto:dantongliu@zju.edu.cn))

The copyright of individual parts of the supplement might differ from the CC BY 4.0 License.

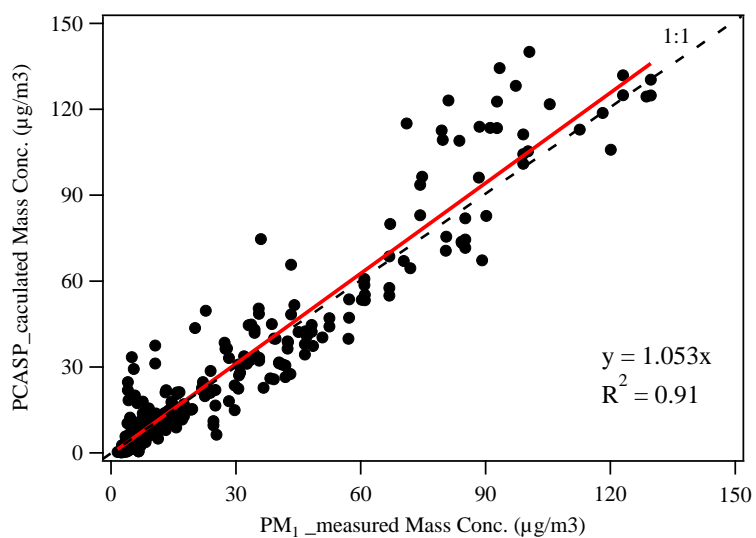

Figure S1. Comparison between PM1 derived from the PCASP size distribution and measurements in the cabin for all flights.

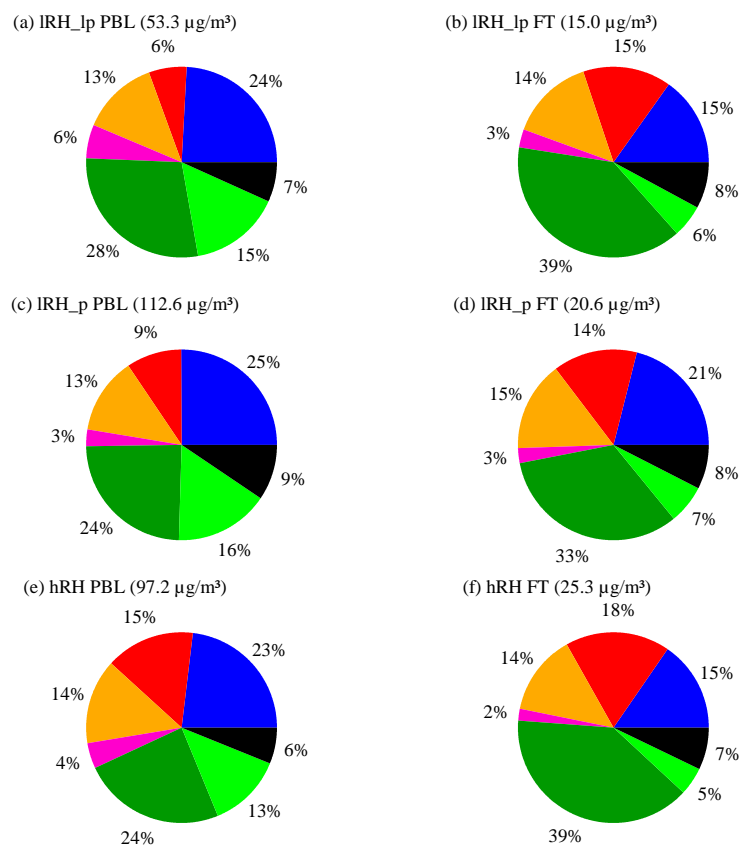

Figure S2. The aerosol chemical compositions in the PBL and FT under all conditions: (a-b) in the PBL and FT under IRH and less polluted conditions (IRH\_lp), (c-d) in the PBL and FT under IRH and polluted conditions (IRH\_p), and (e-f) in the PBL and FT under hRH conditions.

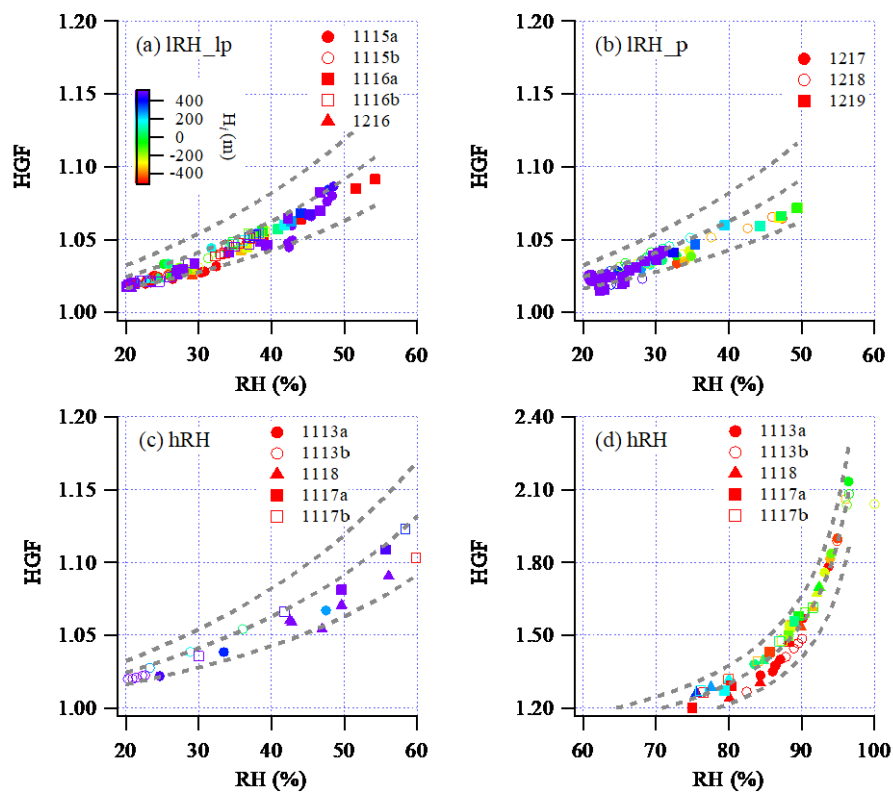

Figure S3. Correlations between hygroscopic growth factor (HGF) and RH, (a) under IRH\_lp condition, (b) under IRH\_p condition, (c) under hRH condition, RH<60%, and (d) under hRH condition, RH>60%. The reference grey dash lines denote the calculated HGFs by assuming constant  $\kappa$  of 0.2, 0.3, 0.4, respectively.

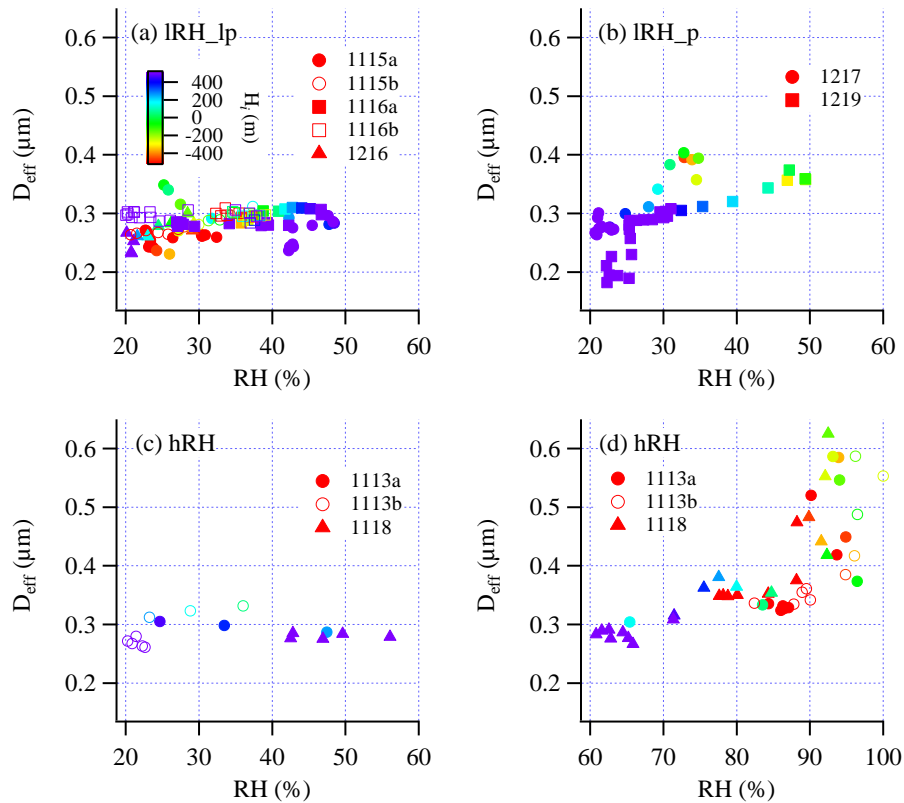

Figure S4. Correlations between  $D_{\text{eff}}$  and RH for all flights, (a) under lRH\_lp condition, (b) under lRH\_p condition, (c) under hRH condition, RH < 60%, and (d) under hRH condition, RH > 60%.

20161113 9:40-12:00 (LT)

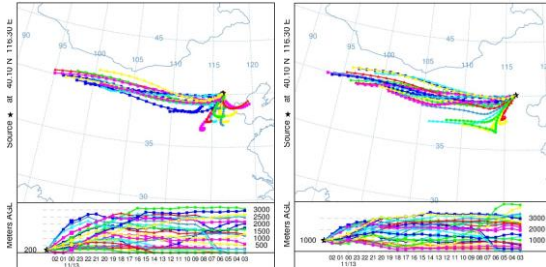

20161113 16:30-18:25 (LT)

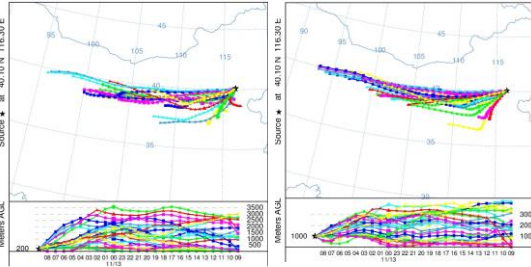

20161115 10:00-12:40 (LT)

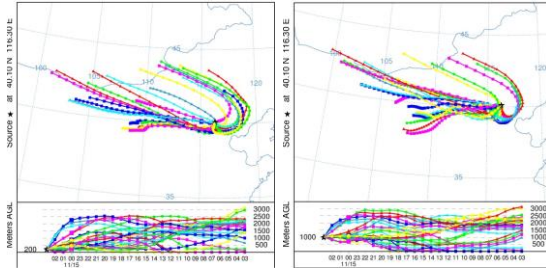

20161115 15:30-17:10 (LT)

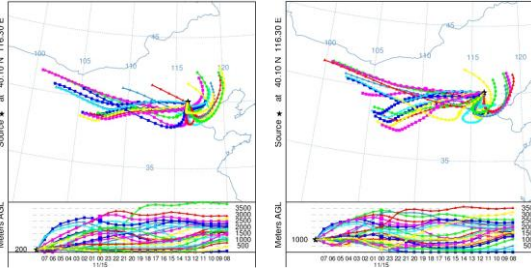

20161116 10:25-12:20 (LT)

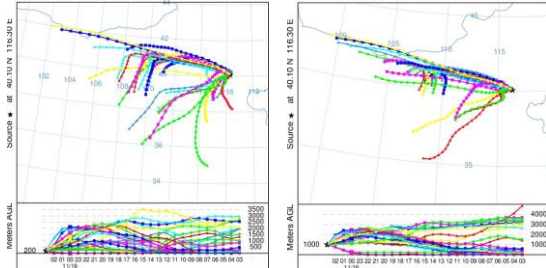

20161116 15:45-18:25 (LT)

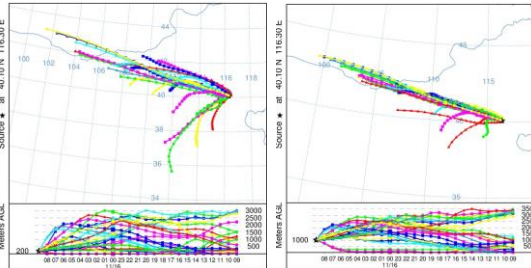

20161117 09:25-10:45 (LT)

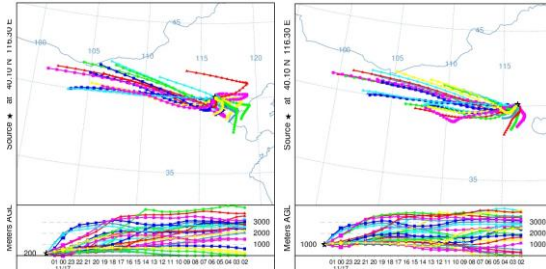

20161117 15:35-17:10 (LT)

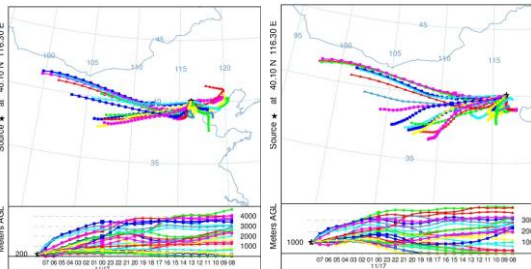

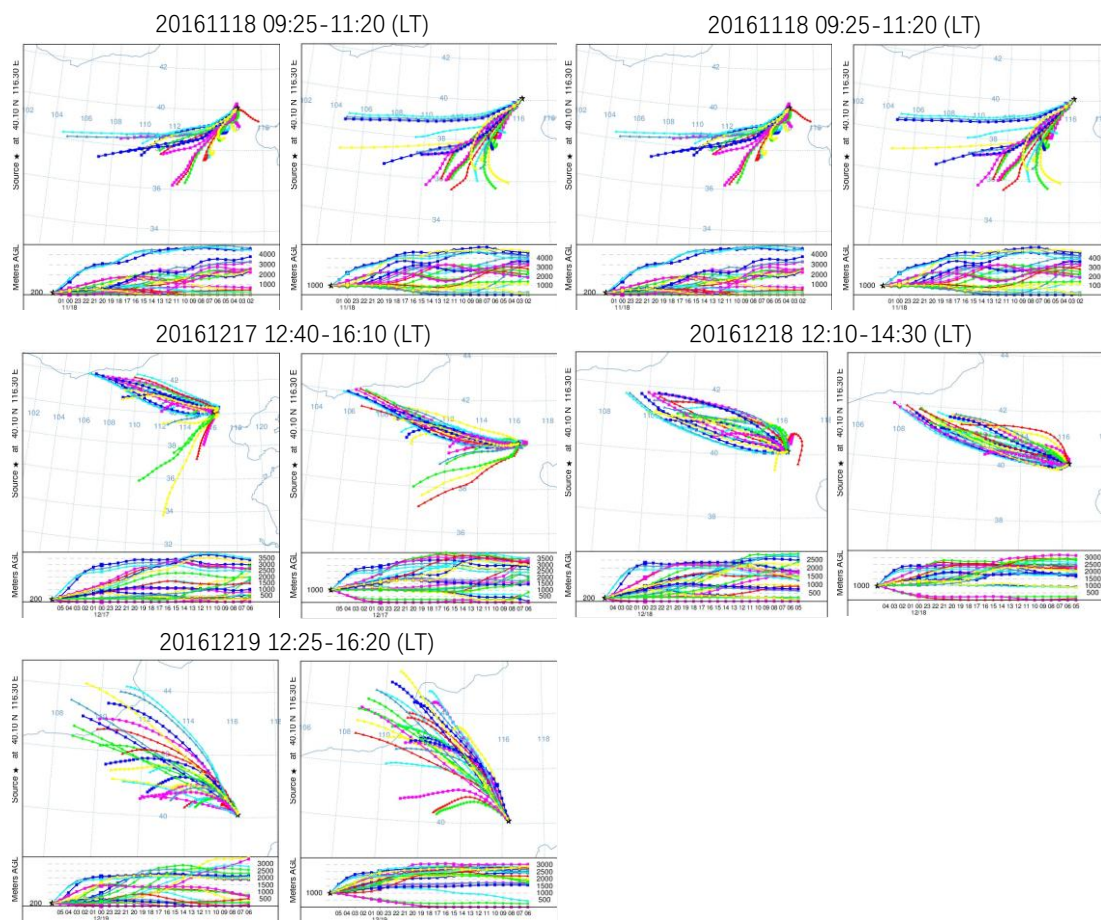

Figure S5. HYSPLIT ensemble backward trajectories during the experiment. The endpoint heights of back trajectories are set to 200 m a.s.l (left panels) and 1000 m a.s.l. (right panels). LT=local Time.
